# Supplementary material for: Concurrent Infection with SARS-CoV-2 and Orientia tsutsugamushi during the COVID-19 Pandemic in the Maldives
Source: MDPI journal article supplement (doi:10.3390/tropicalmed8020082), 2023-01-25
Supplement: s1 [file s1]

# Supplementary Materials of Concurrent Infection with SARS-CoV-2 and *Orientia tsutsugamushi* during the COVID-19 Pandemic in the Maldives

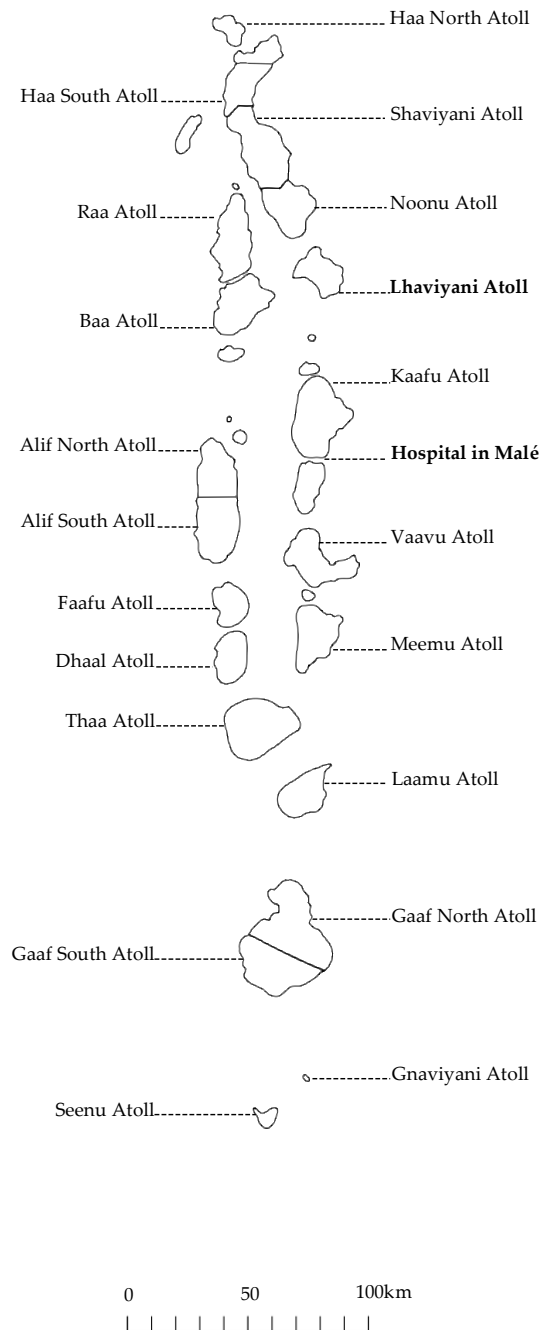

**Figure S1.** Map of Maldives. The atoll name in bold represents the residence atoll of the presented case.

**Table S1.** Summary of cases in the literature and the present case that were co-infected with SARS-CoV-2 and *Orientia tsutsugamushi*.

| Clinical Findings                                                    | Present Case                                                                                                                                                                                                                                                                                                                     | Other Cases                                                                                                                                                                                                                 |                                                                                                                                                                                                                                                                |                                                                                                                                                                                                                                                     |                                                                                                                                                                                                                                                     |
|----------------------------------------------------------------------|----------------------------------------------------------------------------------------------------------------------------------------------------------------------------------------------------------------------------------------------------------------------------------------------------------------------------------|-----------------------------------------------------------------------------------------------------------------------------------------------------------------------------------------------------------------------------|----------------------------------------------------------------------------------------------------------------------------------------------------------------------------------------------------------------------------------------------------------------|-----------------------------------------------------------------------------------------------------------------------------------------------------------------------------------------------------------------------------------------------------|-----------------------------------------------------------------------------------------------------------------------------------------------------------------------------------------------------------------------------------------------------|
|                                                                      |                                                                                                                                                                                                                                                                                                                                  | Case I[39]                                                                                                                                                                                                                  | Case II[40]                                                                                                                                                                                                                                                    | Case III[41]                                                                                                                                                                                                                                        | Case IV[41]                                                                                                                                                                                                                                         |
| Patient's characteristics                                            | 40-year-old female from Maldives                                                                                                                                                                                                                                                                                                 | 14-year-old female from Nepal                                                                                                                                                                                               | 70-year-old female from south India                                                                                                                                                                                                                            | 55-year-old male from central India                                                                                                                                                                                                                 | 35-year-old male from north central India                                                                                                                                                                                                           |
| Presenting complaints, symptoms and signs of illness                 | <ul style="list-style-type: none"> <li>▪ Fever</li> <li>▪ Body aches</li> <li>▪ Fatigue</li> <li>▪ Cough</li> <li>▪ Dyspnea</li> </ul>                                                                                                                                                                                           | <ul style="list-style-type: none"> <li>▪ Fever</li> <li>▪ Headache</li> <li>▪ Myalgia</li> <li>▪ Arthralgia</li> <li>▪ Cough</li> <li>▪ Dyspnea</li> </ul>                                                                  | <ul style="list-style-type: none"> <li>▪ Fever</li> <li>▪ Fatigue</li> <li>▪ Myalgia</li> </ul>                                                                                                                                                                | <ul style="list-style-type: none"> <li>▪ Fever</li> <li>▪ Cough</li> <li>▪ Dyspnea</li> <li>▪ Altered sensorium</li> </ul>                                                                                                                          | <ul style="list-style-type: none"> <li>▪ Fever</li> <li>▪ Cough</li> <li>▪ Dyspnea</li> <li>▪ Altered sensorium</li> </ul>                                                                                                                          |
| Onset of symptoms prior to presentation                              | ▪ 10 days                                                                                                                                                                                                                                                                                                                        | ▪ 7 days                                                                                                                                                                                                                    | ▪ 3 days                                                                                                                                                                                                                                                       | ▪ unrecorded                                                                                                                                                                                                                                        | ▪ 7 days                                                                                                                                                                                                                                            |
| Vital signs and finding supporting of clinical diagnosis             | <ul style="list-style-type: none"> <li>▪ Temperature: 38.0°C</li> <li>▪ BP: 80/50mmHg</li> <li>▪ PR: 108 beats per min</li> <li>▪ RR: 28 breaths per min</li> <li>▪ SpO<sub>2</sub>: 92% (room air)</li> <li>▪ Eschar: on the right antecubital fossa</li> <li>▪ Crackles audible on auscultation of both lung fields</li> </ul> | <ul style="list-style-type: none"> <li>▪ Temperature: 38.3°C</li> <li>▪ BP: 108/72 mmHg</li> <li>▪ PR: 112 beats per min</li> <li>▪ RR:</li> <li>▪ SpO<sub>2</sub>: 95% (room air)</li> <li>▪ Eschar: unreported</li> </ul> | <ul style="list-style-type: none"> <li>▪ Temperature:</li> <li>▪ BP: 120/80mmHg</li> <li>▪ PR: 80 beats per min.</li> <li>▪ RR: 20 breaths per min.</li> <li>▪ SpO<sub>2</sub>: 99% (room air)</li> <li>▪ Eschar: on the left infra-axillary region</li> </ul> | <ul style="list-style-type: none"> <li>▪ Temperature: unrecorded</li> <li>▪ BP: 100/58 mmHg</li> <li>▪ PR: 54 beats per min.</li> <li>▪ RR: 20 breaths per min.</li> <li>▪ SpO<sub>2</sub>: 100% (room air)</li> <li>▪ Eschar: not found</li> </ul> | <ul style="list-style-type: none"> <li>▪ Temperature: unrecorded</li> <li>▪ BP: 130/90 mmHg</li> <li>▪ PR: 140 beats per min.</li> <li>▪ RR: 38 breaths per min.</li> <li>▪ SpO<sub>2</sub>: 50% (room air)</li> <li>▪ Eschar: not found</li> </ul> |
| Hematological and biochemical abnormalities and findings on imaging. | <ul style="list-style-type: none"> <li>▪ Thrombocytopenia</li> <li>▪ Transaminitis</li> <li>▪ Leukocytosis</li> <li>▪ Lymphopenia</li> <li>▪ Hypoalbuminemia</li> <li>▪ Ferritinemia</li> <li>▪ Chest x-ray: interstitial involvement</li> </ul>                                                                                 | <ul style="list-style-type: none"> <li>▪ Thrombocytopenia</li> <li>▪ Transaminitis</li> <li>▪ Leukocytopenia</li> <li>▪ Chest x-ray and computer tomography: dextrocardia</li> </ul>                                        | <ul style="list-style-type: none"> <li>▪ Thrombocytopenia</li> <li>▪ Leukocytosis</li> </ul>                                                                                                                                                                   | <ul style="list-style-type: none"> <li>▪ No thrombocytopenia</li> <li>▪ Transaminitis</li> <li>▪ Leukocytosis</li> <li>▪ Lymphopenia</li> <li>▪ Hypoalbuminemia</li> <li>▪ Elevated IL-6</li> <li>▪ Ferritinemia</li> </ul>                         | <ul style="list-style-type: none"> <li>▪ No thrombocytopenia</li> <li>▪ Transaminitis</li> <li>▪ Leukocytosis</li> <li>▪ Hypoalbuminemia</li> </ul>                                                                                                 |
| Laboratory confirmation: scrub typhus/ COVID-19                      | <ul style="list-style-type: none"> <li>▪ SARS-CoV-2 RT-PCR: +ve</li> <li>▪ Scrub typhus IgM/IgG antibodies: +ve</li> </ul>                                                                                                                                                                                                       | <ul style="list-style-type: none"> <li>▪ SARS-CoV-2 RT-PCR: +ve</li> <li>▪ Scrub typhus IgM/IgG antibodies: +ve</li> </ul>                                                                                                  | <ul style="list-style-type: none"> <li>▪ SARS-CoV-2 RT-PCR: +ve</li> <li>▪ Scrub typhus qPCR: +ve</li> </ul>                                                                                                                                                   | <ul style="list-style-type: none"> <li>▪ SARS-CoV-2 RT-PCR: +ve</li> <li>▪ Scrub typhus IgM ELISA: +ve</li> </ul>                                                                                                                                   | <ul style="list-style-type: none"> <li>▪ RT-PCR for COVID-19: +ve</li> <li>▪ IgM ELISA: +ve</li> </ul>                                                                                                                                              |
| Complications                                                        | ▪ ARDS                                                                                                                                                                                                                                                                                                                           | ▪ Unreported                                                                                                                                                                                                                | ▪ Unreported                                                                                                                                                                                                                                                   | ▪ Meningoencephalitis                                                                                                                                                                                                                               | ▪ ARDS and MODS                                                                                                                                                                                                                                     |
| Antimicrobial therapy                                                | <ul style="list-style-type: none"> <li>▪ Ceftriaxone</li> <li>▪ Remdesivir</li> <li>▪ Doxycycline</li> </ul>                                                                                                                                                                                                                     | ▪ Unreported                                                                                                                                                                                                                | ▪ Doxycycline                                                                                                                                                                                                                                                  | <ul style="list-style-type: none"> <li>▪ Ceftriaxone</li> <li>▪ Vancomycin</li> <li>▪ Doxycycline</li> </ul>                                                                                                                                        | <ul style="list-style-type: none"> <li>▪ Hydroxychloroquine</li> <li>▪ Piperacillin/tazobactam</li> <li>▪ Meropenem</li> <li>▪ Doxycycline</li> </ul>                                                                                               |
| Outcomes                                                             | ▪ Recovered                                                                                                                                                                                                                                                                                                                      | ▪ Unreported                                                                                                                                                                                                                | ▪ Recovered                                                                                                                                                                                                                                                    | ▪ Recovered                                                                                                                                                                                                                                         | ▪ Fatal                                                                                                                                                                                                                                             |

BP: blood pressure, PR: pulse rate, RR: respiratory rate, SpO<sub>2</sub>: oxygen saturation, IL-6: interleukin 6, SARS-CoV-2: severe acute respiratory syndrome associated virus 2, RT-PCR: reverse transcriptase polymerase chain reaction, IgM: immunoglobulin M, IgG: immunoglobulin G, ELISA: enzyme linked immunosorbent assay, COVID-19: coronavirus disease 2019.
